# Supplementary material for: Exploration of elastic moduli of molecular crystals via database screening by pretrained neural network potential
Source: Royal Society of Chemistry journal article supplement (doi:10.1039/d3ce01263h), 2024-01-01
Supplement: d3ce01263h1.pdf [file d3ce01263h1.pdf]

## Supporting Information

### **Exploration of elastic moduli of molecular crystals via database screening by pretrained neural network potential**

Takuya Taniguchi\*<sup>1</sup>

<sup>1</sup> Center for Data Science, Waseda University, 1-6-1 Nishiwaseda, Shinjuku-ku, Tokyo 169-8050, Japan

\* Correspondence to [takuya.taniguchi@aoni.waseda.jp](mailto:takuya.taniguchi@aoni.waseda.jp)

#### **Contents**

|                          |             |
|--------------------------|-------------|
| Supporting Tables S1-S4  | page S2-S5  |
| Supporting Figures S1-S8 | page S6-S13 |

## Supporting Tables

**Table S1.** Cell volume change of the optimized structure from the experimental structure.

| Compound                  | Literature  |                          | This work   |                      |                         |
|---------------------------|-------------|--------------------------|-------------|----------------------|-------------------------|
|                           | Refcode     | $\Delta V_{S-HF-3c}$ (%) | Refcode     | $\Delta V_{PFP}$ (%) | $\Delta V_{CHGNet}$ (%) |
| 1,2,4,5-tetrabromobenzene | TETBBZ01    | -3.1                     | TETBBZ03*   | 1.62                 | 135.89                  |
| 1,3-dinitrobenzene        | DNBENZ10    | -4.2                     | DNBENZ10    | -1.22                | 8.30                    |
| 1,3,5-trichlorobenzene    | TCHLBZ      | -0.2                     | TCHLBZ      | 2.70                 | 49.45                   |
| 3-nitroaniline            | MNIANL05    | -5.8                     | MNIANL05    | -0.21                | 5.35                    |
| acenaphthene              | ACENAP03    | -9.3                     | ACENAP03    | -0.97                | 24.32                   |
| anthracene                | ANTCEN14    | -10.2                    | ANTCEN14    | 2.81                 | 18.98                   |
| aspirin                   | ACSALA07    | -6.5                     | ACSALA07    | -2.71                | 9.53                    |
| benzene                   | BENZEN      | -12.8                    | BENZEN      | -1.85                | 26.84                   |
| benzil                    | BENZIL02    | -8.9                     | BENZIL02    | -0.77                | 12.12                   |
| benzophenone              | BPHENO10    | -11.2                    | BPHENO17*   | -0.94                | 16.20                   |
| beta-HMX                  | OCHTET15    | 3.9                      | OCHTET15    | 1.74                 | 8.61                    |
| carbamazepine             | CBMZPN01    | -8.1                     | CBMZPN01    | 1.45                 | 24.25                   |
| citric acid               | CITRAC10    | -4.9                     | CITRAC10    | -1.22                | 6.33                    |
| citric acid monohydrate   | CITARC02    | -2.7                     | CITARC02    | -2.54                | 3.45                    |
| DC apohost                | QQQESP01    | -6.5                     | QQQESP01    | -1.33                | - **                    |
| durene                    | DURENE01    | -11.6                    | DURENE01    | -6.15                | 106.28                  |
| epsilon CL-20             | PUBMUU02    | 2.4                      | PUBMUU02    | 5.88                 | 10.95                   |
| hippuric acid             | HIPPAC      | -5.0                     | HIPPAC      | 0.56                 | 10.63                   |
| HMT                       | HXMTAM08    | -8.2                     | HXMTAM03*   | -0.90                | 3.65                    |
| iodic acid                | ICSD-66643  | -13.2                    | ICSD-66643  | -0.77                | 15.28                   |
| maleic acid               | MALIAC11    | -5.2                     | MALIAC11    | -0.81                | 11.52                   |
| malonic acid              | MALNAC06    | -3.5                     | MALNAC06    | 2.22                 | 10.37                   |
| melamine                  | MELAMI02    | -6.2                     | MELAMI02    | 0.069                | 10.61                   |
| naphthalene               | NAPHTA36    | -12.2                    | NAPHTA36    | 4.19                 | 20.79                   |
| oxalic acid dihydrate     | OXACDH04    | -1.7                     | OXACDH04    | -6.12                | 6.40                    |
| pentaerythritol           | PERYTO03    | -3.7                     | PERYTO03    | -1.93                | 32.53                   |
| PETN                      | PERYTN10    | -0.5                     | PERYTN11*   | 3.08                 | 11.48                   |
| phenothiazine             | PHESAZ07    | -6.0                     | PHESAZ07    | -1.25                | 17.83                   |
| phthalic acid             | PTHAC02     | -7.9                     | PTHAC02     | -0.89                | 11.53                   |
| POM                       | MNPYDO      | -1.9                     | MNPYDO      | 2.94                 | 12.85                   |
| pyrazine                  | PYRAZI      | -9.3                     | PYRAZI      | 5.74                 | 7.65                    |
| RDX                       | CTMTNA12    | 0.9                      | CTMTNA12    | 2.66                 | 11.02                   |
| Alpha-resorcinol          | RESORA19    | -6.6                     | RESORA19    | -0.27                | 3.63                    |
| Beta-resorcinol           | RESORA24    | -7.5                     | RESORA24    | 2.72                 | 13.76                   |
| rubrene                   | QQCIG11     | -8.3                     | QQCIG11     | -0.98                | 21.70                   |
| succinic acid             | SUCACB10    | -7.2                     | SUCACB12*   | -1.18                | 12.35                   |
| succinimide               | SUCCIN01    | -6.0                     | SUCCIN01    | -2.30                | 13.78                   |
| sulfamic acid             | ICSD-94     | -10.0                    | ICSD-94     | -2.85                | 5.33                    |
| sulfur                    | ICSD-200454 | -1.5                     | ICSD-200454 | -0.13                | 49.12                   |
| tartaric acid             | TARTAC01    | -2.8                     | TARTAC01    | -1.88                | 11.63                   |
| taurine                   | TAURIN03    | -8.5                     | TAURIN03    | -1.50                | 11.73                   |
| TCNE                      | TCYETY01    | -9.6                     | TCYETY01    | -2.75                | 14.58                   |
| thiourea                  | THIOUR01    | 6.6                      | THIOUR01    | -6.89                | 38.96                   |
| tolane                    | DPHACT02    | -11.1                    | DPHACT03*   | 0.76                 | 16.06                   |
| urea                      | UREAXX22    | -7.1                     | UREAXX22    | -2.50                | 1.14                    |

|  |            |      |  |       |       |
|--|------------|------|--|-------|-------|
|  | Mean Error | -5.7 |  | -0.33 | 19.88 |
|  | MAE        | 6.5  |  | 2.15  | 19.88 |

\* The original CIF file did not have the hydrogen atom positions assigned, so they were changed to this CIF file.

\*\* QQQESP01, which has the largest volume in the dataset, was not calculated using CHGNet due to the shortage of computation memory.

**Table S2.** Cell volume change of X23 dataset after structure optimization by NNPs.

| Compound             | CSD identifier         | $\Delta V_{\text{PFP}}$ (%) | $\Delta V_{\text{CHGNet}}$ (%) |
|----------------------|------------------------|-----------------------------|--------------------------------|
| vdW-bonded systems   |                        |                             |                                |
| 1,4-Cyclohexanedione | CYHEXO                 | -0.51                       | 14.78                          |
| Adamantane           | ADAMAN08               | 1.39                        | 197.83                         |
| Anthracene           | ANTCEN09               | 7.07                        | 23.82                          |
| Benzene              | BENZEN01               | 2.05                        | 31.90                          |
| Carbon dioxide       | SACBAA02               | 12.04                       | 22.38                          |
| Hexamine             | QAMCAM                 | -1.36                       | 7.08                           |
| Naphthalene          | NAPHTA23               | 10.31                       | 31.04                          |
| Pyrazine             | PYRAZI01               | 9.11                        | 11.15                          |
| Pyrazole             | PYRZOL05               | 12.78                       | 42.10                          |
| s-Triazine           | TRIZIN                 | -9.50                       | -4.80                          |
| s-Trioxane           | TROXAN11               | 0.59                        | 15.63                          |
| H-bonded systems     |                        |                             |                                |
| Acetic acid          | ACETAC07               | -0.52                       | 9.09                           |
| Ammonia              | -                      | -9.64                       | 5.43                           |
| Cyanamide            | CYANAM01               | -0.70                       | 22.10                          |
| Cytosine             | CYTSIN01               | 3.01                        | 19.65                          |
| Ethyl carbamate      | ECARBM01               | -0.26                       | 7.68                           |
| Formamide            | FORMAM02               | 1.28                        | 18.76                          |
| Imidazole            | IMAZOL04               | 6.63                        | 36.22                          |
| Oxalic acid $\alpha$ | OXALAC03               | -0.43                       | 20.92                          |
| Oxalic acid $\beta$  | OXALAC04               | 1.81                        | 20.16                          |
| Succinic acid        | SUCACB10               | -6.22                       | -1.29                          |
| Uracil               | URACIL                 | -0.06                       | 11.34                          |
| Urea                 | UREAXX02               | 0.86                        | 4.18                           |
|                      |                        |                             |                                |
|                      | MAE (total)            | 4.27                        | 25.19                          |
|                      | MAE (vdW bonding)      | 6.06                        | 36.59                          |
|                      | MAE (Hydrogen bonding) | 2.62                        | 14.74                          |

**Table S3.** Validation data, whose paper has been published in 2023.

| CCDC number | $\Delta V_{\text{PFP}}$ (%) | $\Delta V_{\text{CHGNet}}$ (%) |
|-------------|-----------------------------|--------------------------------|
| 2045405     | 3.49                        | 21.53                          |
| 2107786     | -1.26                       | -*                             |
| 2191502     | -1.78                       | -*                             |
| 2191503     | 0.40                        | 13.89                          |
| 2191504     | -1.10                       | -*                             |
| 2191505     | -1.32                       | 31.27                          |
| 2191506     | 0.069                       | -*                             |
| 2191507     | -0.58                       | 71.32                          |
| 2192139     | 0.58                        | 47.45                          |
| 2206389     | 9.08                        | 30.12                          |
| 2208671     | 0.59                        | 39.43                          |
| 2208672     | 0.43                        | 21.93                          |
| 2216257     | -2.43                       | 17.65                          |
| 2216734     | 2.80                        | 24.93                          |
| 2216735     | 0.13                        | 129.92                         |
| 2216737     | 2.83                        | 25.51                          |
| 2219715     | 2.25                        | 12.90                          |
| 2219716     | 5.28                        | 27.16                          |
| 2242898     | 0.23                        | 5.50                           |
| 2242899     | 0.90                        | 7.45                           |
|             |                             |                                |
| MAE         | 1.88                        | 33.00                          |

\* The crystal structure was not optimized using CHGNet due to computation memory limit.

**Table S4.** Nanoindentation dataset of experimental Young's modulus and predicted values by PFP.

| CSD refcode | Name           | Indentation direction | $E_{\text{exp}}$ (GPa) | $E_{\text{pred}}$ (GPa) |
|-------------|----------------|-----------------------|------------------------|-------------------------|
| AMBNAC06    | pABA- $\alpha$ | [200]                 | 7.17                   | 3.054                   |
| AMBNAC04    | pABA- $\beta$  | [10-1]                | 11.38                  | 7.503                   |
| NBZOAC03    | pNBA-I         | [002]                 | 9.19                   | 3.394                   |
| NBZOAC14    | pNBA-II        | [002]                 | 5.88                   | 2.251                   |
| SUTHAZ28    | STZ-I          | [100]                 | 10.01                  | 3.518                   |
| SUTHAZ24    | STZ-II         | [100]                 | 20.44                  | 20.878                  |
| SUTHAZ25    | STZ-III        | [100]                 | 16.42                  | 15.063                  |
| SUTHAZ26    | STZ-IV         | [10-1]                | 17.31                  | 13.116                  |
| BINMEQ02    | CCM-I          | [001]                 | 11.15                  | 8.664                   |
| BINMEQ08    | CCM-II         | [100]                 | 5.68                   | 8.668                   |
| BINMEQ07    | CCM-III        | [001]                 | 5.6                    | 9.008                   |
| VAPMEH      | FIA-I          | [001]                 | 8.36                   | 4.55                    |
| VAPMEH01    | FIA-II         | [001]                 | 6.17                   | 8.658                   |
| FOGVIG04    | FAM-A          | [100]                 | 22.6                   | 11.264                  |
| FOGVIG04    | FAM-A          | [001]                 | 20.1                   | 11.206                  |
| FOGVIG05    | FAM-B          | [-101]                | 19.5                   | 11.512                  |
| HIQQAB      | FEB-Q          | [011]*                | 2.5                    | 5.352                   |
| HIQQAB02    | FEB-H1         | [010]*                | 4.5                    | 9.96                    |
| DONTIJ      | FEL-I          | [100]                 | 12.8                   | 10.389                  |
| DONTIJ02    | FEL-III        | [10-1]                | 10.5                   | 12.11                   |
|             |                |                       |                        |                         |
|             |                |                       | MAE                    | 4.28                    |

\* The indentation direction was not assigned in the literature. Thus, it is assumed that indentation was conducted on the major face based on Bravais-Friedel Donnay-Harker (BFDH) morphology.

## Supporting Figures

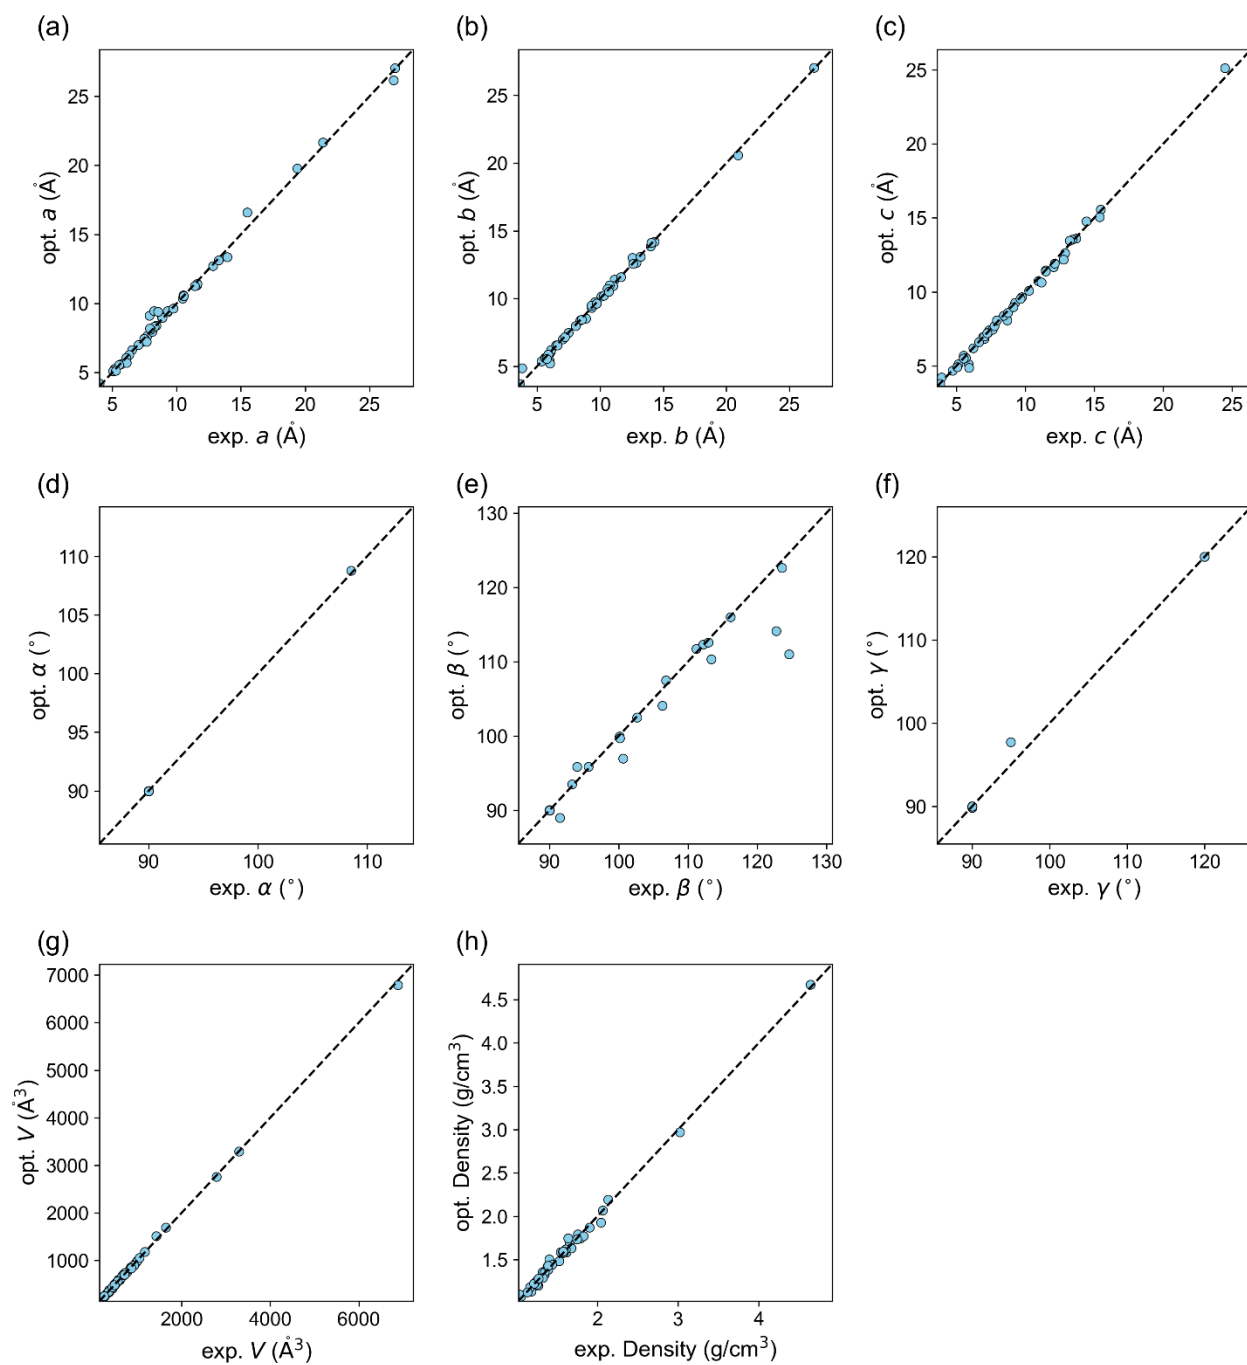

**Figure S1.** The lattice changes before and after the cell optimization using PFP. Elasticity dataset was used for evaluation.

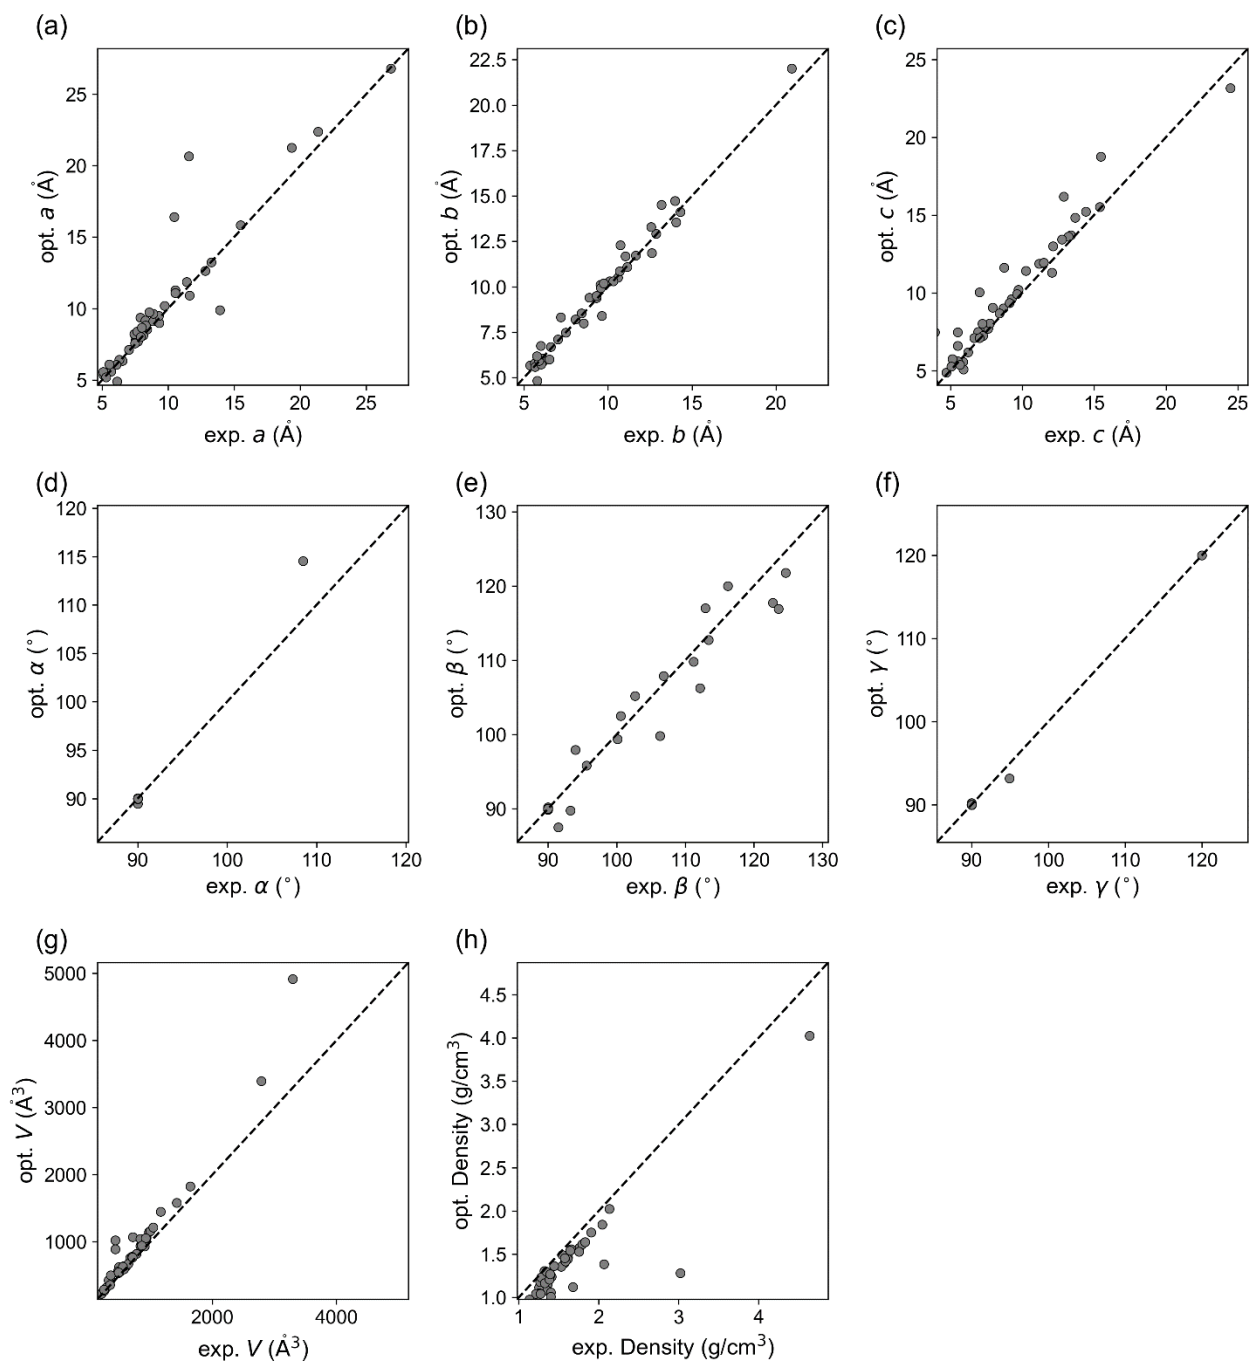

**Figure S2.** The lattice changes before and after the cell optimization using CHGNet. Elasticity dataset was used for evaluation. Note that the data of QQQESP01, which has the largest cell volume, was not processed due to the limitation of CPU memory.

(a)

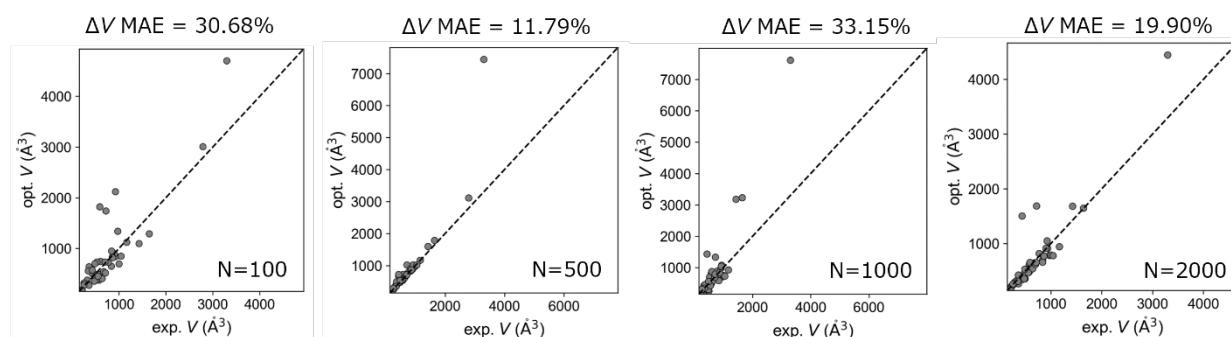

(b)

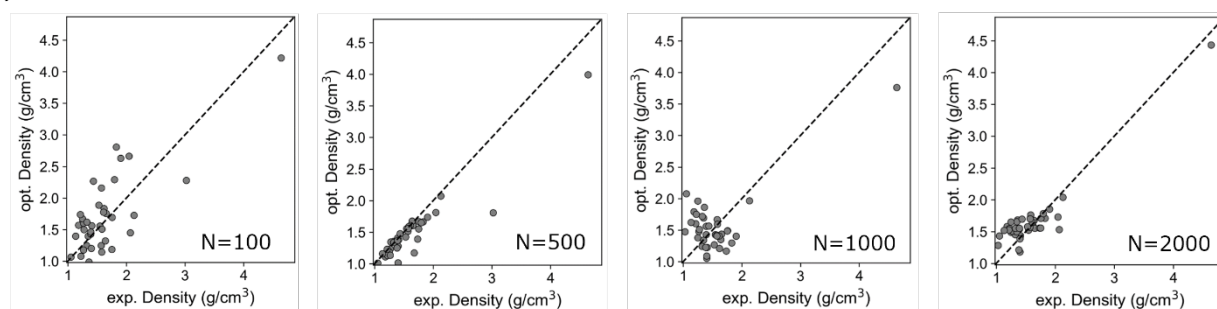

**Figure S3.** (a) Cell volume and (b) density before and after the cell optimization using finetuned CHGNet. Elasticity dataset was used for evaluation. Note that the data of QQQESP01, which has the largest cell volume, was not processed due to the limitation of CPU memory. The number of molecular crystals used for training was written in the bottom right in each scatter plot.



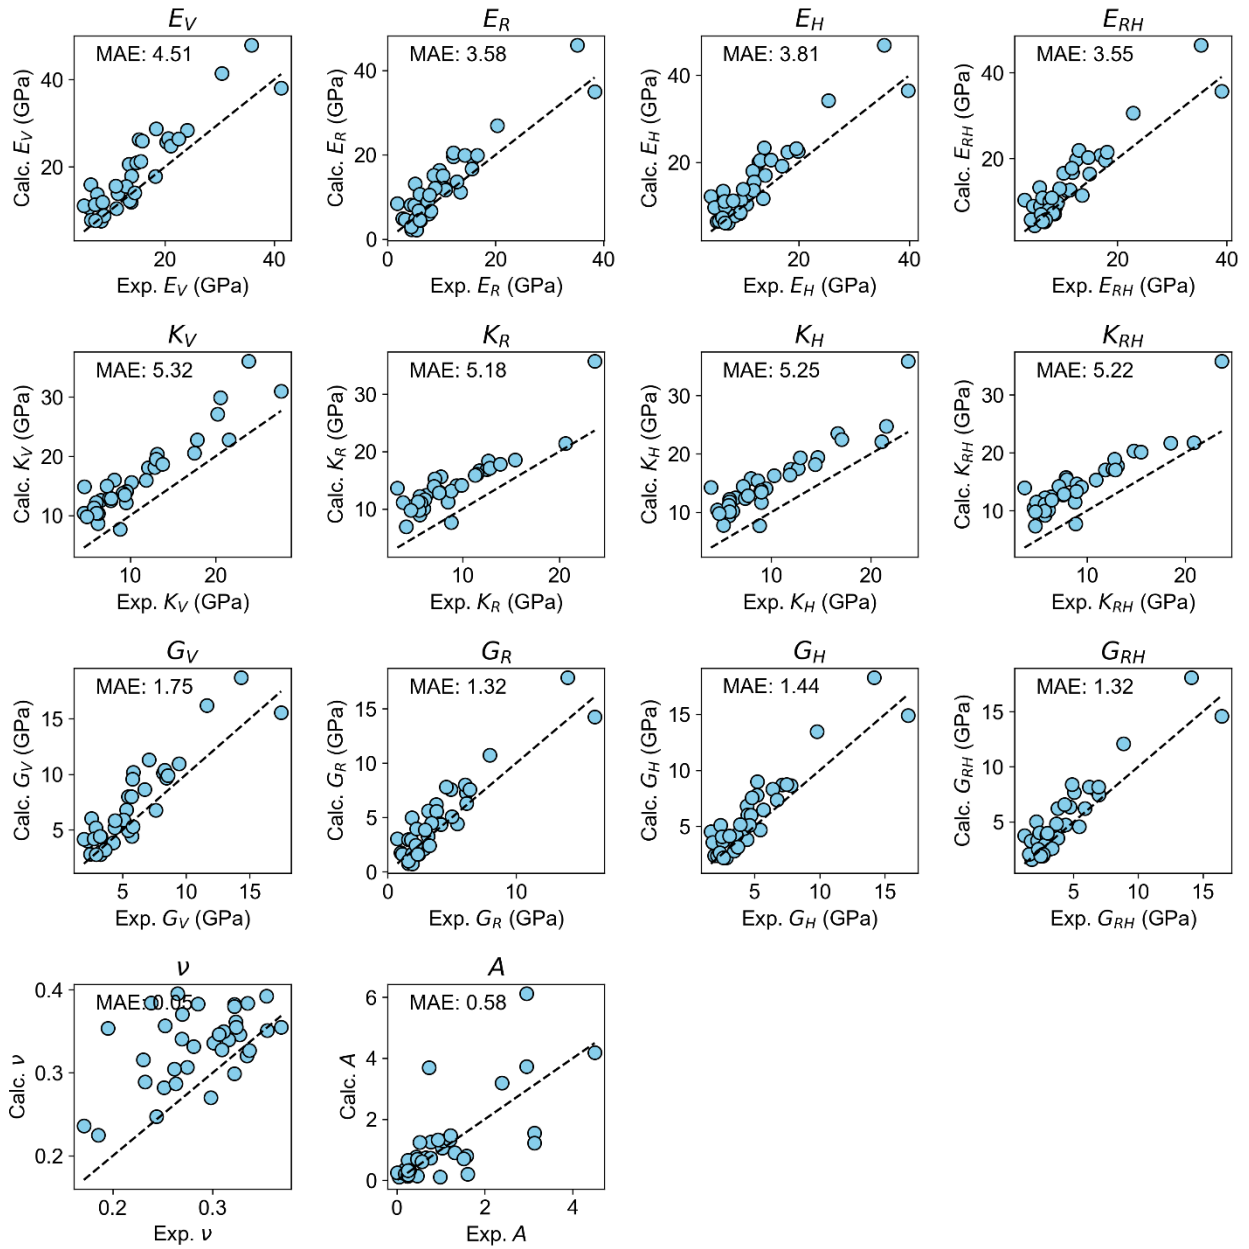

**Figure S4.** The observed-predicted plot of elastic properties calculated by PFP model after the structural relaxation.

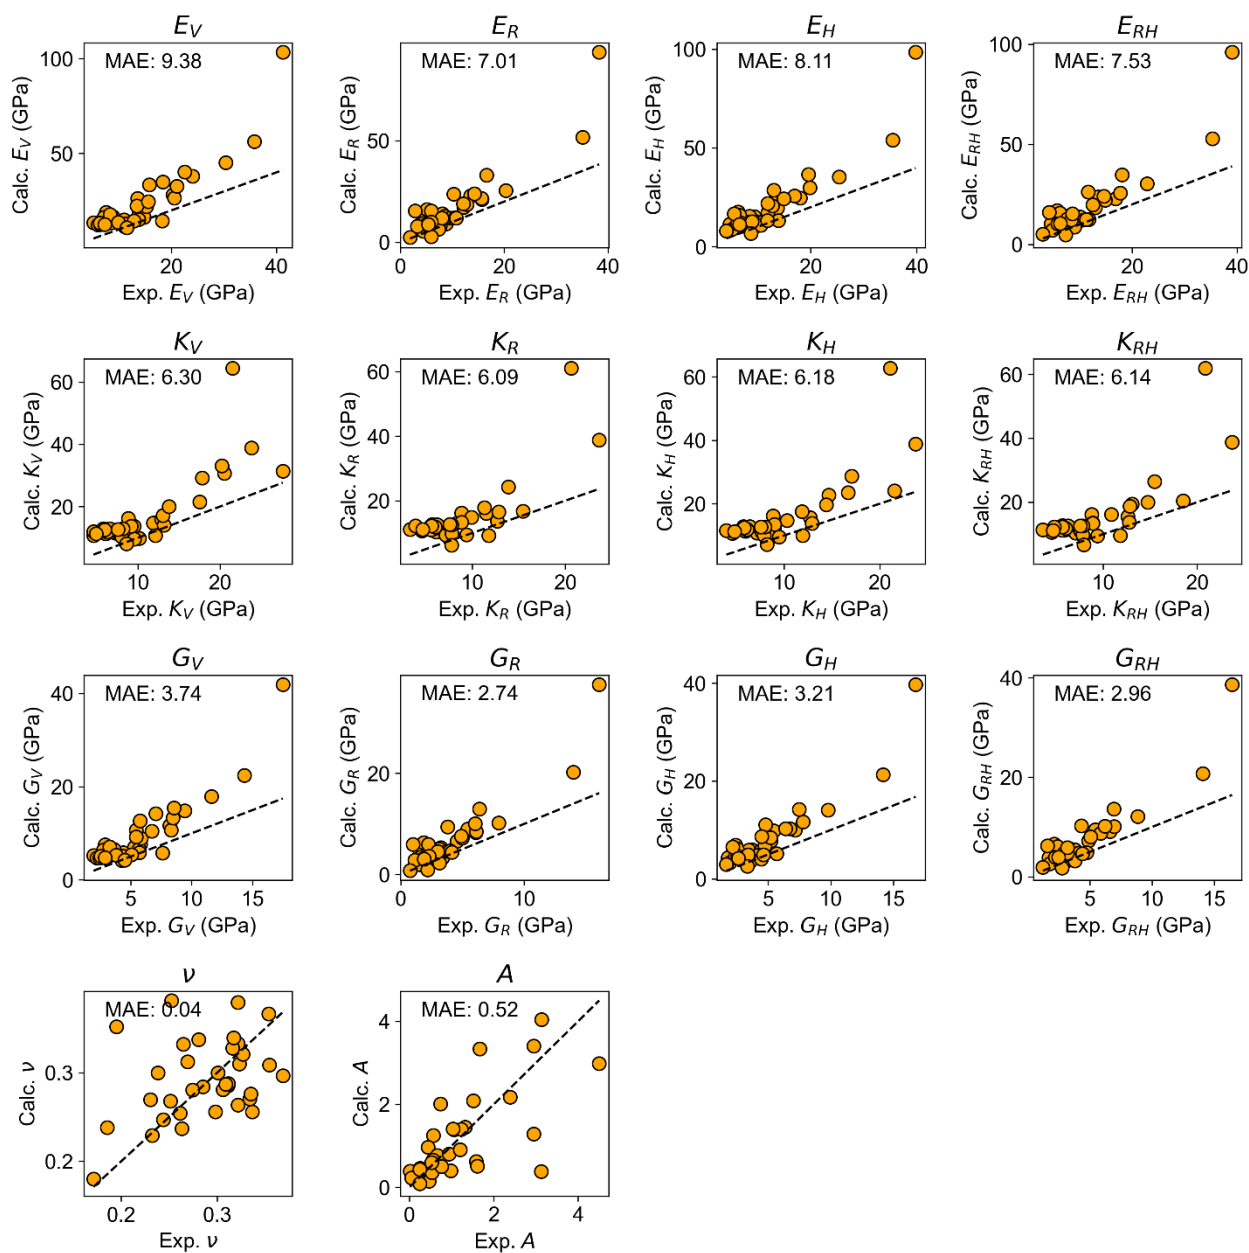

**Figure S5.** The observed-predicted plot of elastic properties calculated by S-HF-3c calculations summarized in the literature.<sup>1</sup>

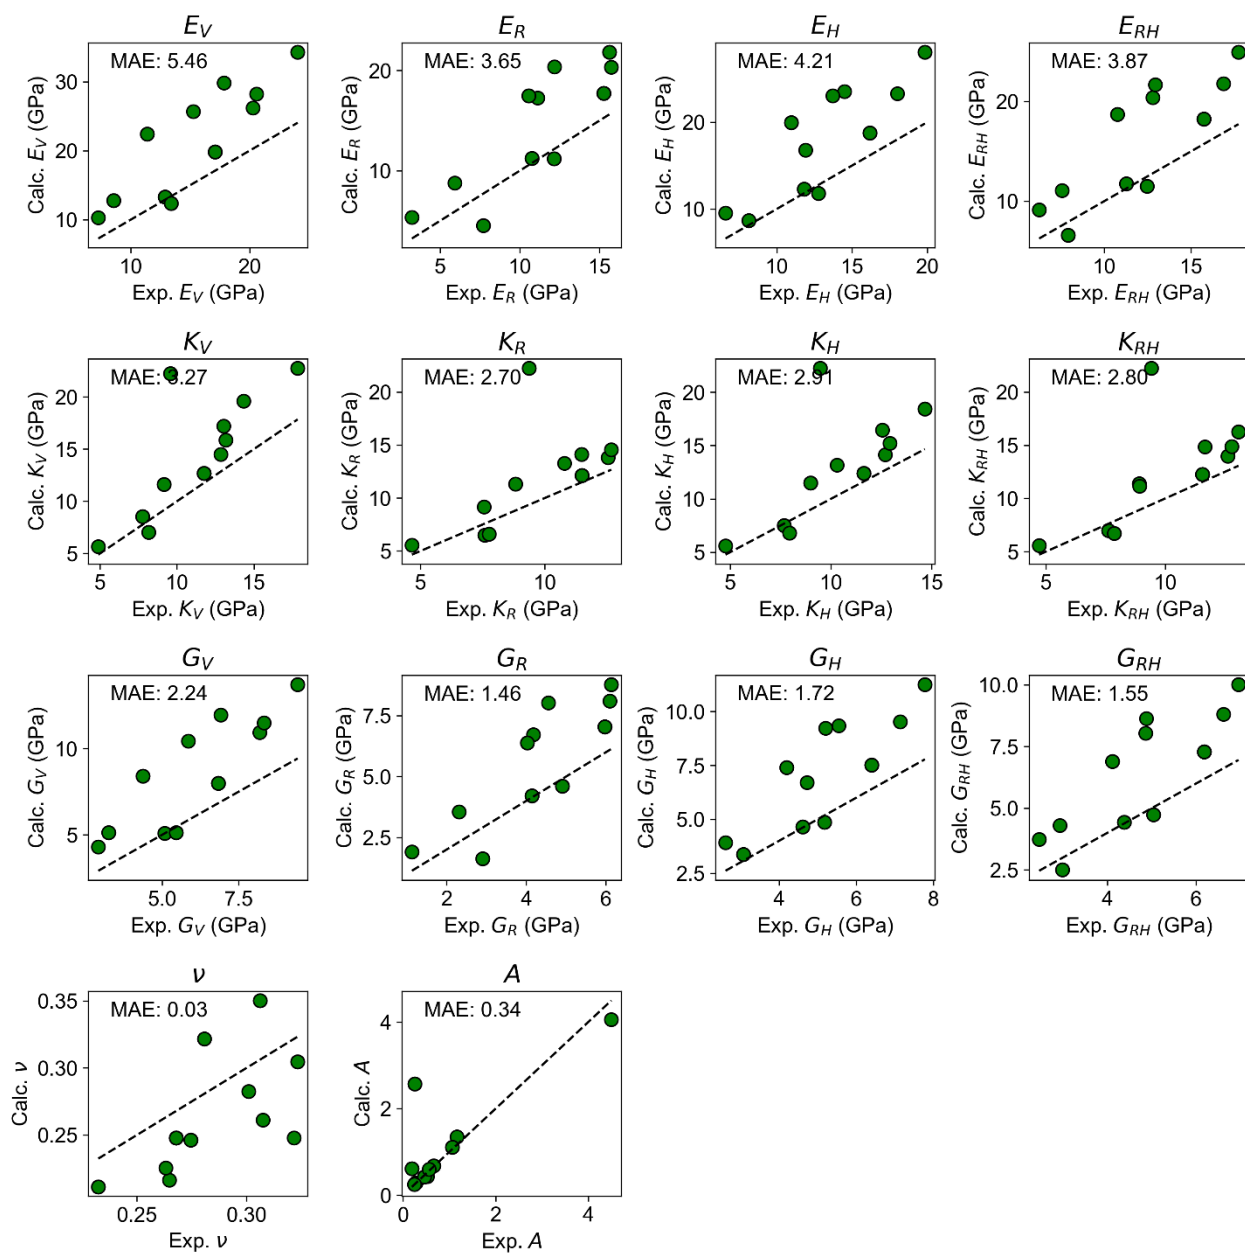

**Figure S6.** The observed-predicted plot of elastic properties calculated by DFT-D calculations summarized in the literature.<sup>1</sup>

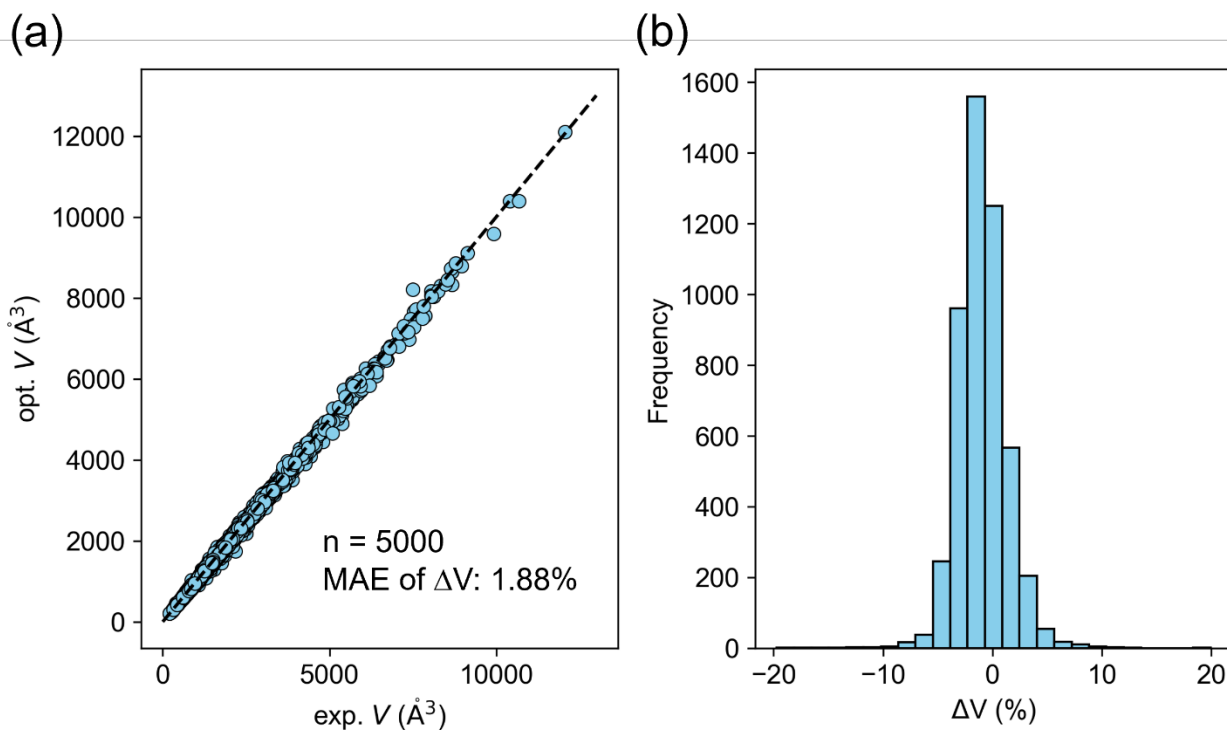

**Figure S7.** The deviation of relaxed cell volumes of 5000 structures from CSD. (a) The observed-predicted plot of the relaxed cell volumes calculated by PFP. (b) Histogram of the relative deviation of the optimized cell volumes from the experimental volumes.

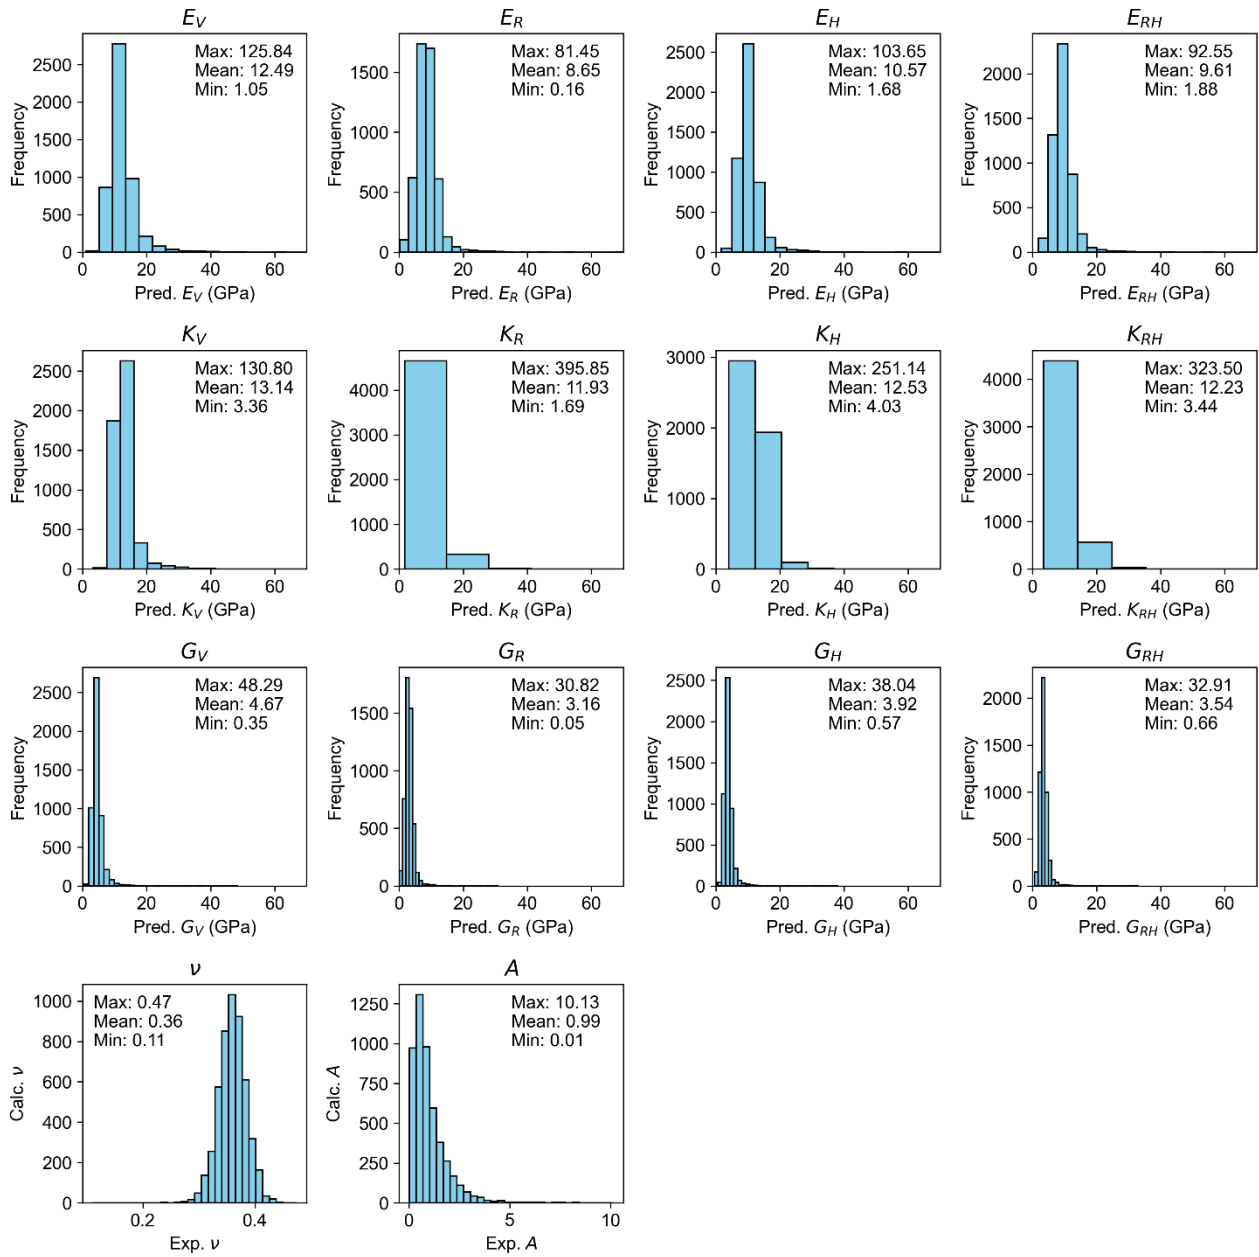

**Figure S8.** Histograms of elastic moduli obtained by large dataset inferred by PFP.
